# Supplementary material for: Size Dependent Plasmonic Effect on BiVO4 Photoanodes for Solar Water Splitting
Source: PubMed Central journal article supplement (PMC4652227; doi:10.1038/srep16660), 2015-11-19
Supplement: srep16660-s1.pdf [file srep16660-s1.pdf]

## Supporting Information

### **Size Dependent Plasmonic Effect on BiVO<sub>4</sub> Photoanodes for Solar Water Splitting**

Liwu Zhang,<sup>\*a,b</sup> Lars O. Herrmann<sup>b</sup> and Jeremy J. Baumberg<sup>\*b</sup>

*<sup>a</sup>Shanghai Key Laboratory of Atmospheric Particle Pollution and Prevention, Department of Environmental Science and Engineering, Fudan University*

*Shanghai, 200433 (China)*

*E-mail: zhanglw@fudan.edu.cn*

*<sup>b</sup>Cavendish Laboratory, Department of Physics, University of Cambridge*

*Cambridge, CB3 0HE (UK)*

*E-mail: jjb12@cam.ac.uk*

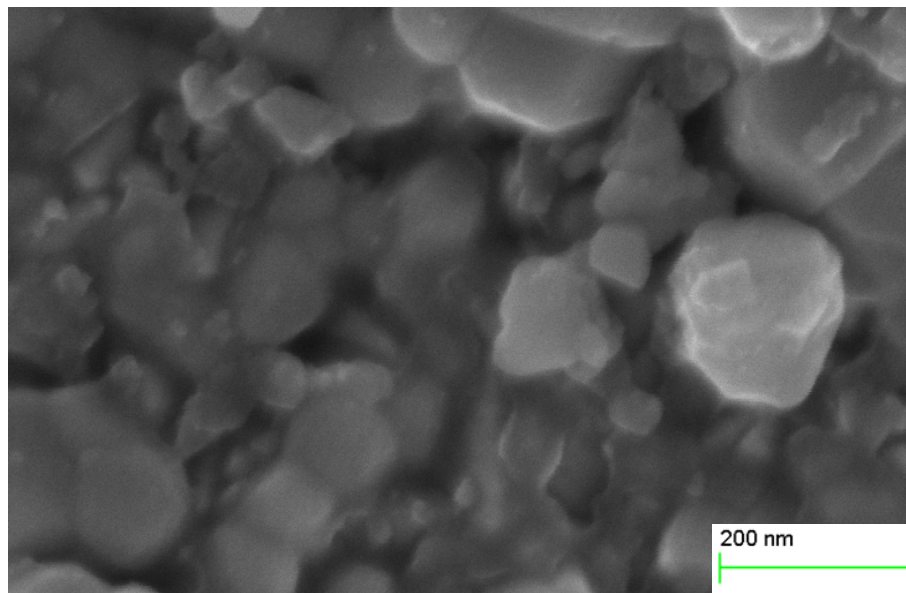

**Figure S1.** SEM image of BiVO<sub>4</sub> film under higher magnification.

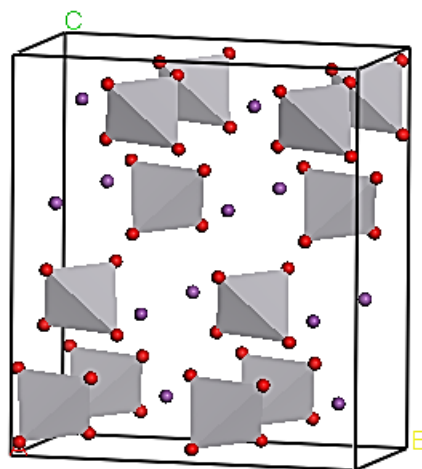

**Figure S2.** Crystal structure of BiVO<sub>4</sub>, purple ball represents Bi and red ball is O.

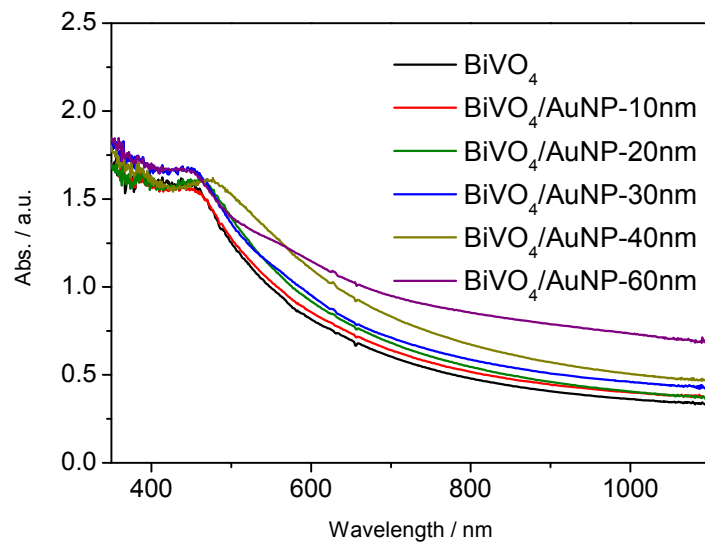

**Figure S3.** Extinction spectra of  $\text{BiVO}_4/\text{AuNPs}$  photoanodes.

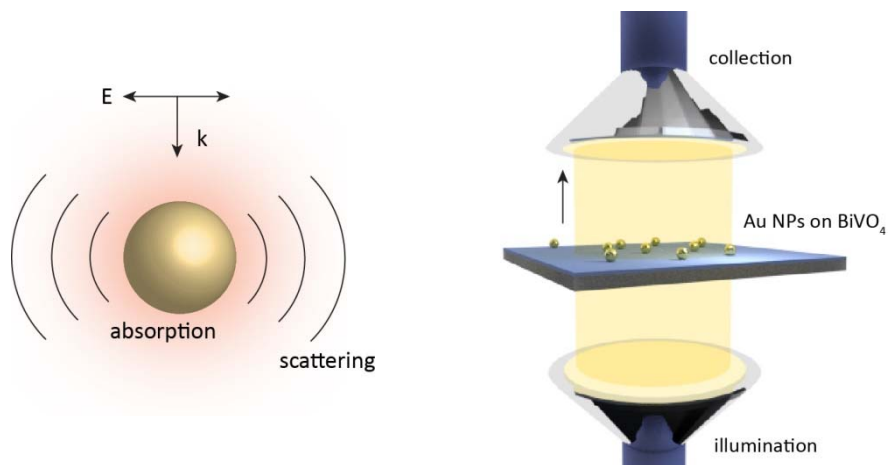

**Figure S4.** A schematic drawing of the difference between the absorption and scattering efficiency of the AuNP (in Figure 5a and 7b) as well as the extinction measurement of  $\text{BiVO}_4/\text{AuNP}$  (in Figure S3).

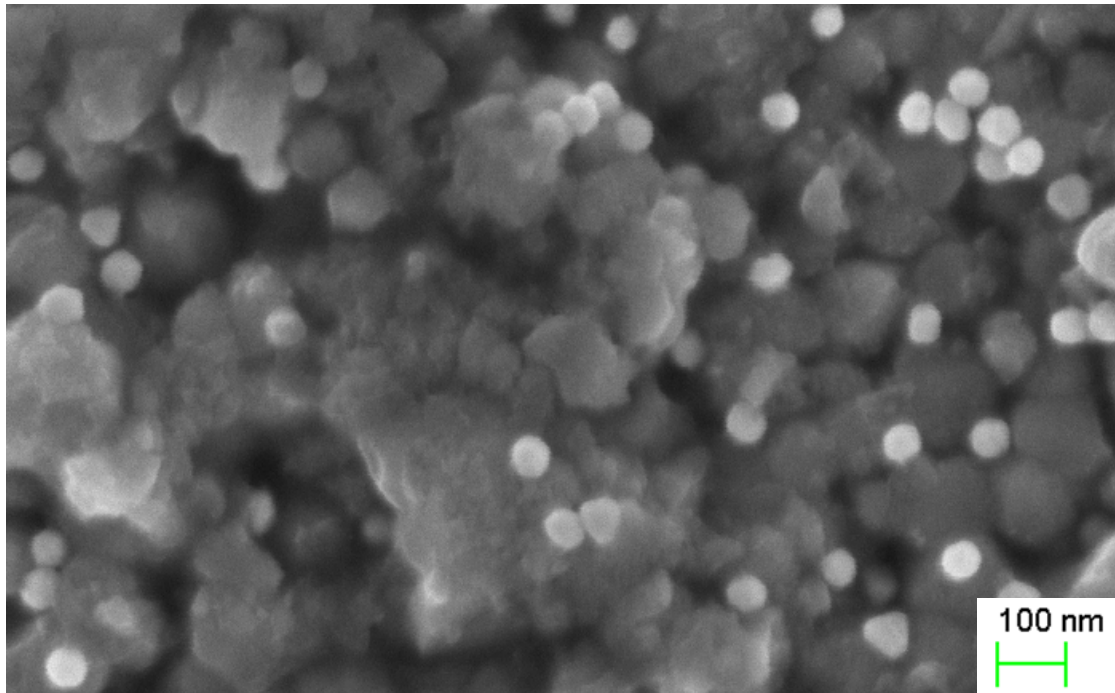

*Figure S5.* SEM image of BiVO<sub>4</sub>/AuNP film under higher magnification.
